# Supplementary material for: Sources and Determinants of Wholegrain Intake in a Cohort of Australian Children Aged 12–14 Months
Source: PubMed Central journal article supplement (PMC7764788; doi:10.3390/ijerph17249229), 2020-12-10
Supplement: ijerph-17-09229-s001.pdf [file ijerph-17-09229-s001.pdf]

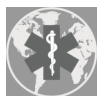

**Supplementary table S1.** Sensitivity analysis: Factors independently<sup>a</sup> associated with usual wholegrain intakes (mean values and 95% confidence interval) of toddlers with plausible energy intakes ( $n = 703$ ).

|                                                   |                           | Unadjusted mean<br>(univariate) |             | Multivariable<br>model |
|---------------------------------------------------|---------------------------|---------------------------------|-------------|------------------------|
| <i>Maternal Characteristics</i>                   |                           | g/day                           | 95% CI      | <i>p</i>               |
| Maternal age (years)                              | <25                       | 13.8                            | 11.0 – 16.7 | 0.001                  |
|                                                   | 25–34                     | 19.1                            | 17.9 – 20.4 | 0.490                  |
|                                                   | ≥35                       | 18.8                            | 16.9 – 20.6 | REF                    |
| Maternal education                                | High school/vocational    | 18.6                            | 17.1 – 20.1 | 0.412                  |
|                                                   | Some university and above | 18.5                            | 17.2 – 19.8 | REF <sup>3</sup>       |
| IRSAD <sup>b</sup>                                | Decile 1–2                | 18.1                            | 15.4 – 20.7 | 0.609                  |
|                                                   | Decile 3–4                | 18.6                            | 16.4 – 20.7 | 0.611                  |
|                                                   | Decile 5–6                | 19.9                            | 17.4 – 22.5 | 0.747                  |
|                                                   | Decile 7–8                | 16.5                            | 14.5 – 18.5 | 0.328                  |
|                                                   | Decile 9–10               | 19.6                            | 17.5 – 21.7 | REF                    |
| Maternal country of birth                         | Australia and New Zealand | 20.0                            | 18.9 – 21.1 | REF                    |
|                                                   | UK                        | 21.3                            | 15.2 – 27.4 | 0.971                  |
|                                                   | India                     | 17.9                            | 14.2 – 21.7 | 0.285                  |
|                                                   | China                     | 9.5                             | 6.4 – 12.6  | <0.001                 |
|                                                   | Asia-other <sup>c</sup>   | 12.1                            | 8.9 – 15.4  | <0.001                 |
|                                                   | Other <sup>c</sup>        | 15.1                            | 11.8 – 18.5 | 0.026                  |
| Number of children                                | 1                         | 18.9                            | 17.4 – 20.4 | REF                    |
|                                                   | 2                         | 18.7                            | 17.2 – 20.3 | 0.689                  |
|                                                   | ≥ 3                       | 17.5                            | 15.0 – 19.9 | 0.063                  |
| <i>Child Characteristics</i>                      |                           |                                 |             |                        |
| Sex                                               | Male                      | 19.3                            | 17.9 – 20.7 | 0.071                  |
|                                                   | Female                    | 17.6                            | 16.3 – 19.0 | REF                    |
| Age of introduction of complementary food (weeks) | < 17                      | 18.8                            | 16.6 – 20.9 | 0.949                  |
|                                                   | ≥ 17                      | 18.5                            | 17.4 – 19.6 | REF                    |

<sup>a</sup> Multivariable linear regression adjusted for age of child at time of 24-h recall. <sup>b</sup> IRSAD, Index of Relative Socio-Economic Advantage and Disadvantage, where 1 = most disadvantaged and 10 = most advantaged. <sup>c</sup> No single country within this group had sample size sufficient for separate statistical analyses.
